# Supplementary material for: Photocontrolled DNA nanotubes as stiffness tunable matrices for controlling cellular behavior
Source: Royal Society of Chemistry journal article supplement (doi:10.1039/d2nr05202d), 2023-01-01
Supplement: d2nr05202d1.pdf [file d2nr05202d1.pdf]

Electronic Supplementary Information

**Photo-controlled DNA Nanotubes as Stiffness Tunable Matrices for Controlling Cellular Behavior**

Soumya Sethi,<sup>a</sup> Tomoko Emura,<sup>a</sup> Kumi Hidaka,<sup>a</sup> Hiroshi Sugiyama,<sup>a,b\*</sup> and Masayuki Endo <sup>a,b,c\*</sup>

<sup>a</sup> Department of Chemistry, Graduate School of Science, Kyoto University, Sakyo-ku, Kyoto 606-8502, Japan.

<sup>b</sup> Institute for Integrated Cell-Material Sciences, Kyoto University, Sakyo-ku, Kyoto 606-8501, Japan.

<sup>c</sup> Organization for Research and Development of Innovative Science and Technology, Kansai University, Suita, Osaka 564-8680, Japan.

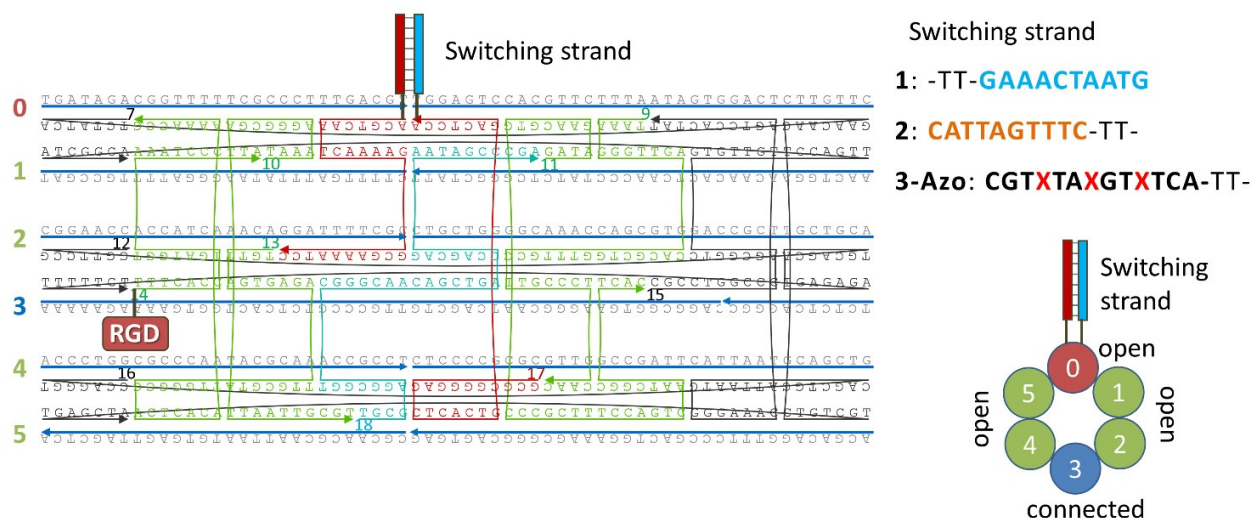

**Figure S1.** Design of DNA nanotube with switching strands and RGD ligand. DNA helix number (helix 0-5) is indicated in the left side of the design (caDNAno) and the DNA sequences are listed in Table S1 and S2.

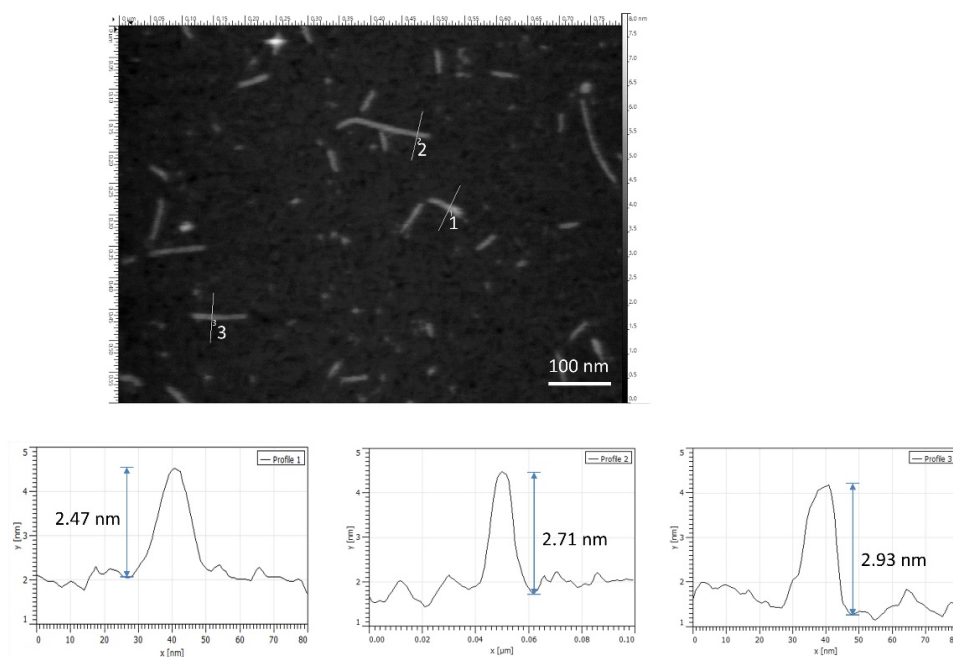

**Figure S2.** Height measurement of DNA nanotubes without modification. AFM image and the example of height profiles. The height of DNA nanotubes was obtained as  $2.67 \pm 0.34$  nm (SD), which is reasonable for two-layered dsDNA.<sup>1-2</sup>

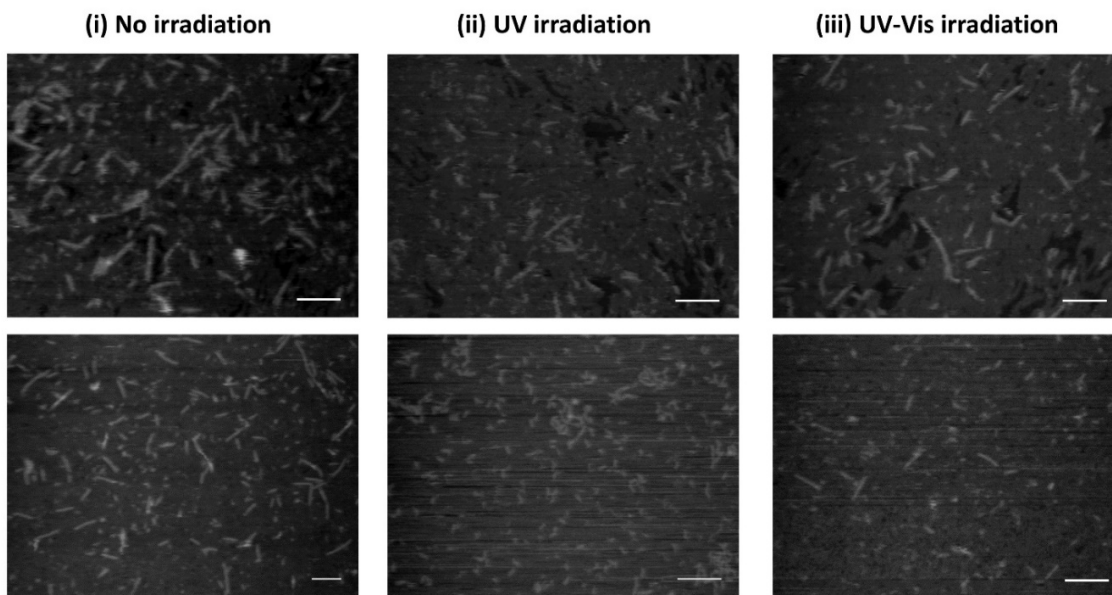

**Figure S3.** Morphology change of azobenzene-containing DNA nanotubes (Azo-nanotube) with photoirradiation. AFM images of Azo-nanotubes. (i) Initial state of assembled Azo-nanotube. (ii) UV-irradiated Azo-nanotube. (iii) UV-Vis irradiated Azo-nanotube. Scale bars: 100 nm.

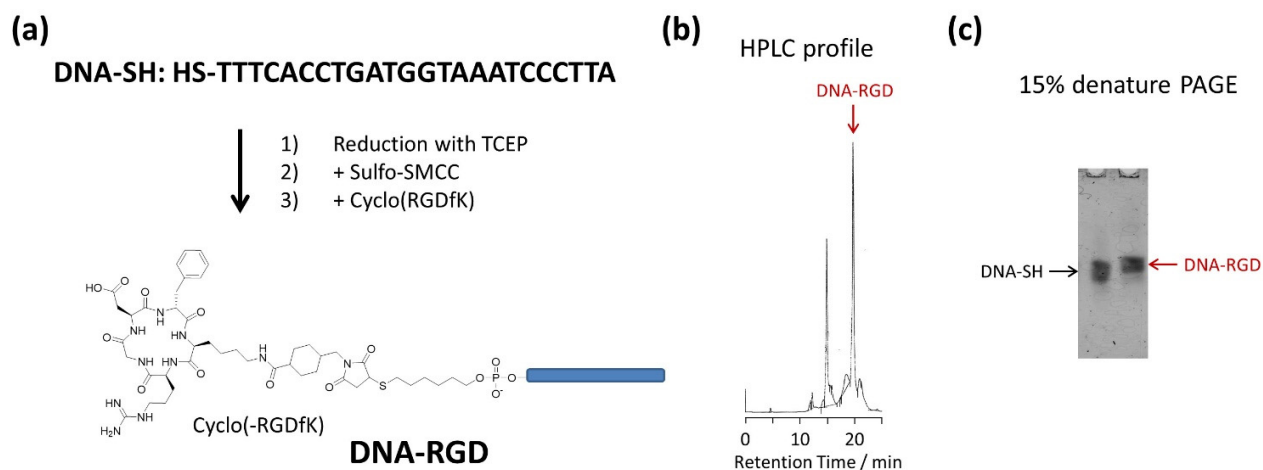

**Figure S4.** Characterization of the conjugation of RGD to DNA strand. (a) Scheme for the DNA-RGD synthesis. (b) HPLC profile for purification. (c) 15% denaturing PAGE gel (8M urea) of HPLC-purified RGD-conjugated DNA.

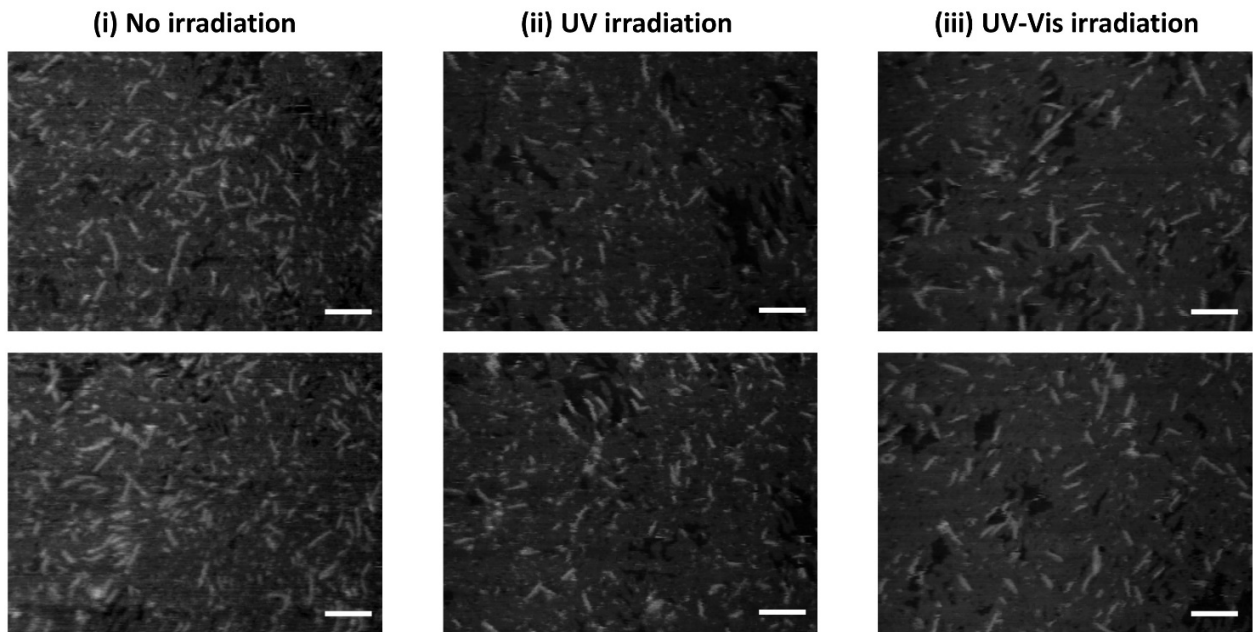

**Figure S5.** Morphology change of RGD-conjugated Azo-nanotubes with photoirradiation. AFM images of RGD-modified Azo-nanotubes. (i) Initial state of RGD- conjugated Azo-nanotube. (ii) UV-irradiated RGD- conjugated Azo-nanotube. (iii) UV-Vis irradiated RGD- conjugated Azo-nanotube. Scale bars: 100 nm.

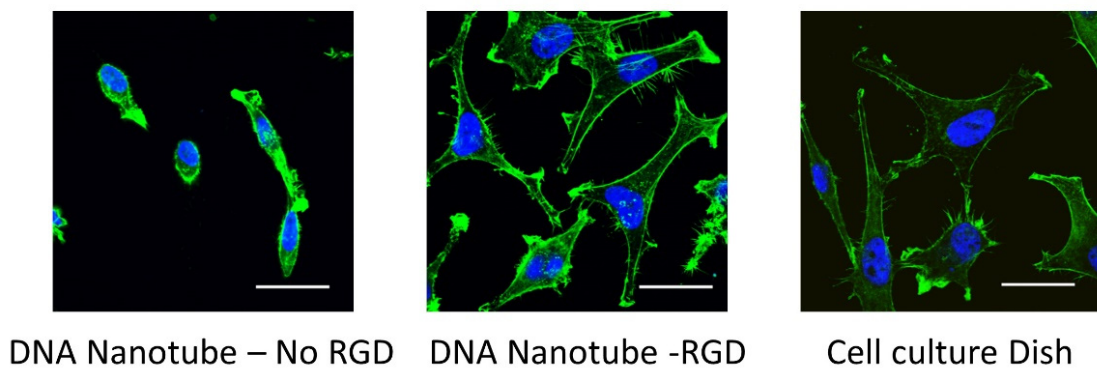

**Figure S6.** Comparison of cell spreading for different substrates. DNA nanotubes coated glass for cell adhesion and spreading. (a) Confocal images of HeLa cells cultured on three different substrates (DNA nanotube – NO RGD, DNA nanotube – RGD, on cell culture plate). Scale bar 30  $\mu$ m.

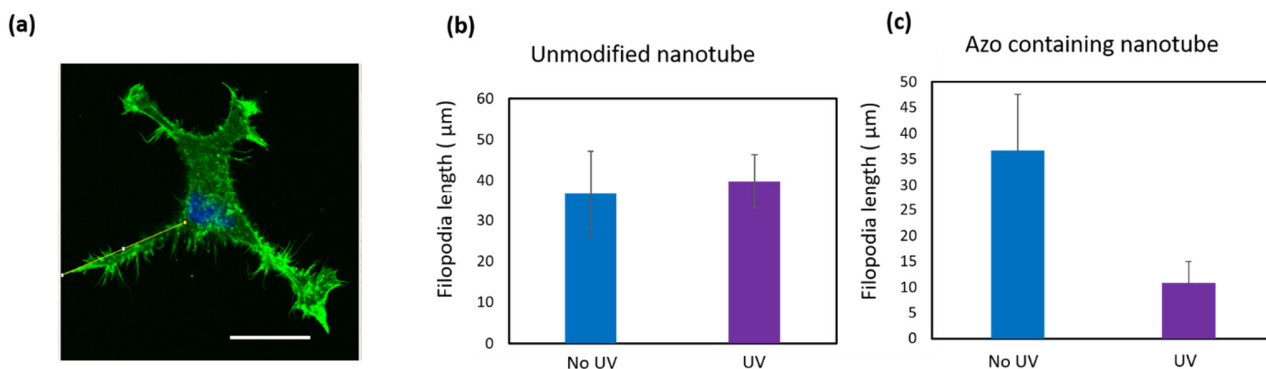

**Figure S7.** Measurement of the filopodia length. (a) An example image for the measurement of the filopodia length (yellow line in the image). The length of the filopodia from the cell body was manually calculated in each case using image J. Scale bar- 20  $\mu\text{m}$ . (b) Filopodia length of the samples with unmodified nanotubes with no irradiation and with pre-UV irradiation was compared. (c) Filopodia length of non-irradiated samples and pre-UV irradiated samples (UV irradiated on azobenzene nanotubes in solution) was compared.

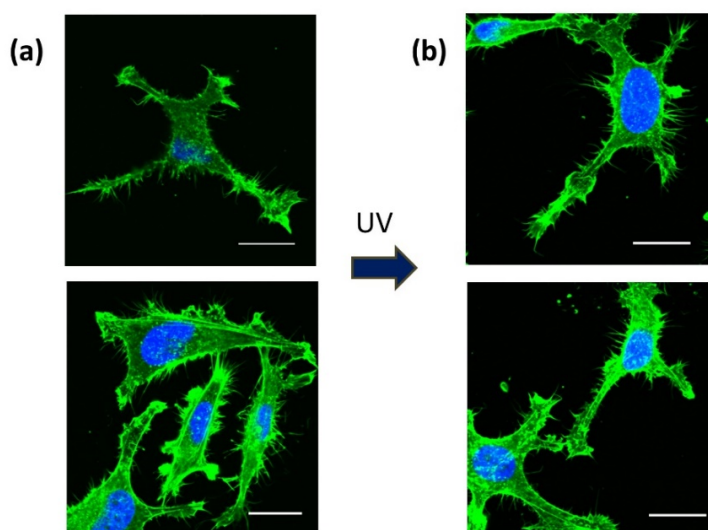

**Figure S8.** A control experiment to verify that change in morphology is observed only in response to the conformation change of the DNA nanotubes. More than 50 cells were analysed in each case. (a) Representative Images of HeLa cells on control tubes (without any switching strand). (b) Representative Images of HeLa cells on UV irradiated control tubes. Scale bar: 20  $\mu\text{m}$ .

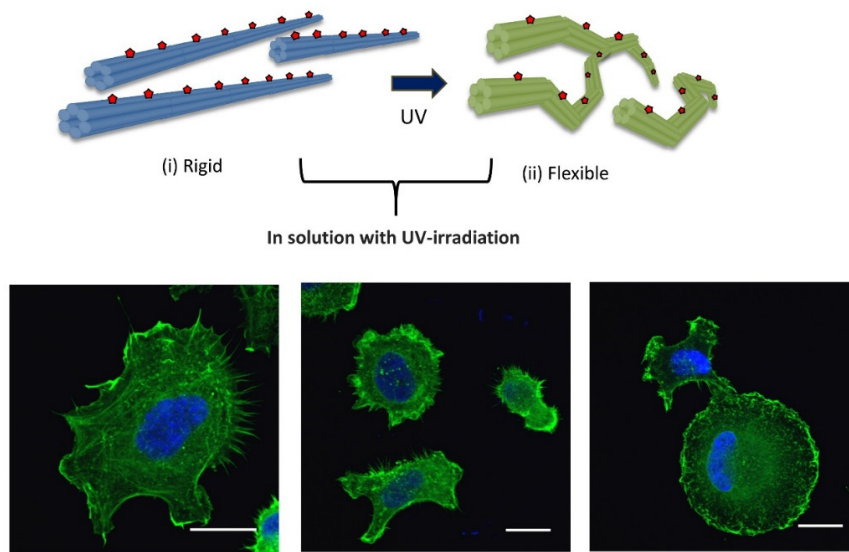

**Figure S9.** Analysing morphology change of cells seeded RGD-conjugated DNA nanotubes (pre-irradiated with UV). A control experiment to check the morphology on the flexible matrix. Scale bar: 20  $\mu\text{m}$

**Table S1. DNA strands for tube formation.**

---

|         |                                                                    |
|---------|--------------------------------------------------------------------|
| Tube_01 | TGGAGTCCACGTTCTTTAATAGTGGACTCTTG TTC-TGATAGACGGTTTTTTCGCCCTTTGACGT |
| Tube_02 | CTTTTGATTTATAAGGGATTTTGCCGAT-AACTGGAACAACACTCAACCCTATCTCGGGCTATT   |
| Tube_03 | CTGCTGGGGCAAACCAGCGTGGACCGCTTGCTGCA-CGGAACCACCATCAAACAGGATTTTCGC   |
| Tube_04 | CAGGCGGTGAAGGGCAATCAGCTGTTGCCCGTCTCACTGGTGAAAAGAAAAA-TCTCTCAGGGC   |
| Tube_05 | CTCCCCGCGCGTTGGCCGATTCATTAATGCAGCTG-ACCCTGGCGCCCAATACGCAAACCGCCT   |
| Tube_06 | CGCAACGCAATTAATGTGAGTTAGCTCA-ACGACAGGTTTCCCGACTGGAAAGCGGGCAGTGAG   |
| Tube_07 | TCTATCAGAACAAGCTGTCGTTGAGCTA                                       |
| Tube_08 | ACGTCAATCAAAAGGCGAAAATCC                                           |
| Tube_09 | TAAAGGGTTGACACGCTGGTTTGCCTTGCCCTCAAC                               |
| Tube_10 | TAAAAGGGCGATTAATTGCGT                                              |
| Tube_11 | GATAGAACGTGCCCGCTTCCAGTCAATCGGCTCAC                                |
| Tube_12 | GGTTCCGTGCAGCATGAGAGATTTTTCT                                       |
| Tube_13 | TGTTAGTGAGATTGCGTATTGGGCGACTCACAAAAACCG                            |
| Tube_14 | TTTCACCTGATGGTAAATCCCTTA                                           |
| Tube_15 | CGCCTGGCCCAGCGGTGCTGTTGTTCCAGTTATCGGCA                             |
| Tube_16 | CCAGGGTCAGCTGCATTAATGGGGAAACAGTCCACTAT                             |
| Tube_17 | GCGCGGGGAGCTCACTGGACTCCA                                           |
| Tube_18 | TGCGAGGCGGTGCGGCAACAGCTGACCAGCAGAATAGCCCGA                         |

---

**Table S2. DNA strands for tube modification.**

---

|                               |                                                   |
|-------------------------------|---------------------------------------------------|
| Tube_17-switching strand 1    | <b>GCGCGGGGAGCTCACTGGACTCCA-TT-GAAACTAATG</b>     |
| Tube_8-switching strand 2     | CGTTAGTTTC-TT-ACGTCAATCAAAAGGCGAAAATCC            |
| Tube_8-switching strand 3-Azo | CGTXXAGTXXTCA-TT-ACGTCAATCAAAAGGCGAAAATCC         |
| Tube_17-8 connect             | GCGCGGGGAGCTCACTGGACTCCA-ACGTCAATCAAAAGGCGAAAATCC |
| Tube_14-RGD                   | <b>RGD-TTTCACCTGATGGTAAATCCCTTA</b>               |

---

## References

1. T. Wang, D. Schiffels, S. M. Cuesta, D. K. Fygenson, N. C. Seeman, Design and Characterization of 1D Nanotubes and 2D Periodic Arrays Self-Assembled from DNA Multi-Helix Bundles. *J. Am. Chem. Soc.* **2012**, 134, 3, 1606–1616.
2. D. Schiffels, T. Liedl, D. K. Fygenson, Nanoscale structure and Microscale Stiffness of DNA nanotubes, *ACS Nano*, **2013**, 7, 6700–6710.
